# Supplementary material for: Are patients who call a primary care office referred to the emergency department by non-healthcare personnel without the input of a physician?
Source: PeerJ. 2016 Mar 28;4:e1507. doi: 10.7717/peerj.1507 (PMC4824903; doi:10.7717/peerj.1507)
Supplement: Supplemental Information 1 — PCP Referral the ED Data Set [file peerj-04-1507-s002.xlsx]

## Sheet: DATA
Emergency Department Referral Sources: Are patients triaged to the Emergency Department by non-healthcare workers?
Data Collection
Subject Number	Survey Collector Name	Participation Status	Gender	Age (< 90 years)	Age (> 90 years)	Race	Yearly Income	Highest Level of Education	Highest Level of Education	Insurance	Question 7	Question 8	Question 9	Question 10	Question 11	Question 12
1	Baum	1	1	22	2	2	3	5		3	6	0
2	Baum	1	1	31	2	2	1	1		3	1	1	1	0	2	2
3	Baum	1	1	26	2	4	1	3		6	6	3
4	Baum	1	1	18	2	2	2	2		3	6	0
5	Baum	1	0	55	2	2	1	1		2	6	0
6	Baum	1	0	31	2	5	1	2			3	1	4	0	2	5
7	Baum	1	0	19	2	2	1	2		6	6	3
8	Baum	1	1	50	2	2	2	1		3	1	0
9	Baum	1	0	51	2	2	1	2		6	1	0
10	Baum	1	1	33	2	2	2	3		2	1	1	4	1	1	1
11	Baum	1	0	34	2	2	4	1		4	1	0
12	Baum	1	1	29	2	2	1	2		3	1	1	3	0	2	2
13	Baum	1	0	30	2	2	1	1		1	1	3
14	Baum	1	1	30	2	5	1	1		3	1	0	2	1	2	5
15	Baum	1	1	41	2	2	1	2		3	6	0
16	Baum	1	1	34	2	2	1	3		2	1	3
17	Close	1	1	76	2	2	1	1		4	1	0
18	Close	1	0	63	2	2	3	3		4	1	1	1	0
19	Close	1	0	77	2	2	1	1		4	4	0
20	Close	1	1	52	2	2	1	1		2	1	0
21	Close	1	0	20	2	2	1	2		6	1	3
22	Close	1	1	49	2	2	1	4		4	1	1	3	0	1	5
23	Close	1	0	42	2	2	1	2		4	6	1	5	0	2	5
24	Close	1	1	62	2	2	2	4		2	6	1	3	1	1	2
25	Close	1	1	31	2	5	1	2		6	6	3
26	Close	1	0	49	2	2	1	1		3	1	1	3	0	2	1
27	Loescher	1	1	54	2	2	1	1		2	1	1	3	0	1	1
28	Melkus	1	0	63	2	3	1	4		4	6	1	3	0	1	5
29	Melkus	1	0	30	2	1	2	2		1	3	0
30	Melkus	1	0	42	2	2	1	1		3	2	1	2	1	1	1
31	Melkus	1	1	33	2	2		1		3	4	0
32	Melkus	1	1	36	2	2	2	2		2	1	0
33	Remme	1	0	43	2	2	1	2		4	1	0
34	Remme	1	1	54	2	2	1	2		2	6	0
35	Remme	1	0	51	2	2	1	2		2	1	0
36	Sieling	1	0	51	2	2	1	1		3	6	1	4	0	1	4
37	Sieling	1	0	44	2	2	3	2		2	2	0
38	Sieling	1	1	41	2	1	1	3		1	6	1	3	0	2	3
39	Sieling	1	1	40	2	2	1	2		6	1	0
40	Sieling	1	0	39	2	2	1	4		6	1	3
41	Sieling	1	1	23	2	2	1	3		3	6	3
42	Sieling	1	0	25	2	2	1	2		6	6	3
43	Sieling	1	1	37	2	1	4	4		6	1	0
44	Sieling	1	0	41	2	2	5	2		1	3	0
45	Sieling	1	0	31	2	2	1	3		6	6	3
46	Sieling	1	1	22	2	2	1	3		2	1	1	3	0	1	4
47	Sieling	1	1	58	2	1	1	2		2	2	1	1	1	1	4
48	Sieling	1	0	55	2	2	1	2		2	1	0
49	Sieling	1	1	18	2	2	3	3		1	3	3
50	Sieling	1	1	23	2	2		1		3	1	0
51	Sieling	1	0	57	2	2	1			3	1	0
52	Sieling	1	1	60	2	2	1	2		2	6	0
53	Sieling	1	1	37	2	2	3	3		1	6	0
54	Tomanec	1	1	64	2	1	1	2		3	6	0
55	Tomanec	1	1	43	2	2	1	2		2	1	0
56	Russell	1	1	46	2	2	1	2		3	6	1	4	1	1	2
57	Russell	1	0	52	2	1	1	5		2	6	3
58	Russell	1	1	48	2	5	2	3		3	1	0
59	Russell	1	1	28	2	2	2	4		1	1	3
60	Russell	1	1	37	2	2	1	2		6	6	3
61	Russell	1	0	56	2	5	1	1		3	1	0
62	Sieling	1	0	33	2	2	1	1		2	2	0
63	Sieling	1	1	22	2	2	2	3		6	1	3
64	Sieling	1	0	59	2	1	1	2		4	2	3
65	Tomanec	1	1	48	2	1	5	4		2	1	1	1		1	4
66	Tomanec	1	1	53	2	2	1	1		3	1	0
67	Cindy	1	0	43	2	1	1			2	2	0
68	Remme	1	1	64	2	1	1	3		2	1	1	1	1	3	5
69	Tomanec	1	1	34	2	1	1	2		6	6	3
70	Melkus	1	0	56	2	1	2	2			6	1	4	1	2	3
71	Cecilia	1	1	33	2	1	1	2		2	1	0
72	Cecilia	1	1	37	2	2	1	3		6	1	0
73	Diedre	1	1	32	2	1	1	1		2	1	3
74	Tomanec	1	0	23	2	2	2	3			1	1	4	1	1	5
75	Erika	1	1	55	2	1	1	2		2	1	1	5	0	2	1
76	Apolinario	1	1	24	2	2	1	3		6	2	1	3	0	2	3
77	Apolinario	1	0	24	2	2	1	1		6	1	0
78	Apolinario	1	1	18	2	2	1	2		3	6	3
79	Sieling	1	0	53	2	2	2	2		1	1	1	3	0	2	4
80	Sieling	1	0	60	2	1	1	5		2	1	3
81	Baum	1	1	22	2	2	1	3		6	1	3
82	Baum	1	0	40	2	1	1	2		6	1	3
83	Baum	1		72	2	2		1		3		1	3	1	3	1
84	Baum/ Ha	1	0	40	2	1	1	2		6	1	0
85	Herrick	1	0	30	2	5	3	3		2	1	3
86	Herrick	1	0	48	2	2	1	1		2	1	0
87	Herrick	1	0	25	2	1	2	2		6	3	0
88	Herrick	1	1	36	2	2	1	1		2	1	1	1	0	1	3
89	Herrick	1	1	46	2	2	1	1		3	1	1	1	1	1	4
90	Herrick	1	0	58	2	2	1	2		2	1	1	3	0	2	3
91	Melkus	1	0	52	2	2	1	1		3	4	1	3	0	2	5
92	Melkus	1	0	62	2	2	2	2		4	6	3
93	Melkus	1	1	30	2	2	1	2		6	1	0
94	Melkus	1		51	2	2		2		3	1	0
95	Melkus	1	0	21	2	2	4	2		6	3	3
96	Melkus	1	1	32	2	2	1	3		3	1	0
97	Melkus	1	1	43	2	2	1	1		2	1	0
98	Melkus	1	1	32	2	2	2	1		3	1	3
99	Melkus/ Ha	1	0	42	2	2	5	4		1	1	1	4	1	1	1
100	Dana	1	0	30	2	2	3	1		6	1	0
101	Kenter	1	0	24	2	2	1	3		2	2	3
102	Gest	1	1	34	2	2	1	3		6	1	3
103	Herrick	1	1	53	2	2	2	3		4	1	1	3	1	1	1
104	Herrick	1	0	27	2	5	1	2		6	1	0
105	Close	1	1	52	2	2	1	1		6	1	3
106	Gest	1	0	62	2	2	1	1		3	1	1	3	0	1	5
107	Gest	1	1	55	2	1	2	1			2	0
108	Gest	1	1	29	2	2	1	1		3	1	1	5	0	1	1
109	Baum	1	1	24	2	2	1	3		2	6	0
110	Herrick	1	1	51	2	2	1	3		2	1	0
111	Gest	1	0	18	2	2	2	1		1	3	0
112	Brodeur	1	0	22	2	5	2	2		1	1	0
113	Kenter	1	0	31	2	2	2	2		2	2	0
114	Kenter	1	0			2		2		3	6	1	4	1	3	1
115	Kane	1	1	56	2	2	1	2		2	1	1	3	0	1	4
116	Kenter	1	1	66	2	2	2	4		1	3	1	4	1	1	1
117	Kenter	1	1	20	2	2	1	1		6	1	3
118	Kenter	1	0	42	2	1	1	3		3	4	3
119	Fries	1	0	61	2	2	1	2		3	1	1	3	0	1	1
120	Fries	1	1	29	2	2	1	3		6	1	3
121	Fries	1	1	28	2	2	1	1		6	1	3
122	Erika	1	0	69	2	2	1	1		3	2	1	4	0	1	1
123	Erika	1	0	19	2	1	1	1		6	6	1	3	0	1	1
124	Erika	1	0	39	2	2	2	2		1	3	1	5	0	3	1
125	Close, Erika	1	1	38	2	2	1	2		6	1	3
126	Close, Erika	1	1	58	2	1	1	3		3	5	3
127	Close, Erika	1	0	55	2	2	1	1		3	4	1	4	0	2	4
128	Close, Erika	1	0	32	2	2		2		2	1	3
129	Close, Erika	1	0	24	2	1	1	2		2	1	0
130	Close, Erika	1	0	62	2	5	1	2		1	1	1	4	1	3	1
131	Brodeur, Erika	1	0	71	2	2	2	1		4	6	1	3	1	1	4
132	Apolinario	1	0	19	2	2		2		2	1	0
133	Apolinario	1	1	22	2	2	2	1		2	1	1	3	0	1	4
134	Apolinario	1	0	21	2	2	2	2		6	2	3
135	Apolinario	1	0	19	2	1	1	1		6	6	1	1	0	1	1
136	Apolinario	1	0	64	2	5	1	1		6	6	3
137	Apolinario	1	1	57	2	1	1	5		1	1	0
138	Apolinario	1	1	35	2	5	1	1		6	1	1	4	1	1	2
139	Apolinario	1	1	28	2	2	1	2		3	1	1	4	1	1	4
140	Apolinario	1	0	54	2	2	3	2		1	3	1	3	0	3	1
141	Apolinario	1	1	20	2	2	1	3		6	6	1	2	0	1	1
142	Apolinario	1	0	28	2	2	2	2		6	3	0
143	Martinez	1	0	38	2	5	1	3		3	1	3
144	Martinez	1	1	31	2	5	2	3		1	2	0
145	Martinez	1	1	52	2	2	1	1		2	6	0
146	Martinez	1	1	25	2	1	2	2		1	3	0
147	Martinez	1	1	46	2	2	1	3		6	1	3
148	Martinez	1	1	39	2	2	1	1		3	6	1	1	1	1	1
149	Martinez	1	0	50	2	2	2	2		2	1	1	3	0	2	1
150	Martinez	1	0	38	2	5	2	3		6	1	0
151	Martinez	1	1	59	2	1	1	4		3	6	3
152	Martinez	1	0	58	2	1	1	2		6	6	0
153	Martinez	1	1	41	2	2	2	1		2	1	0
154	Martinez	1	0	56	2	1	1	3		3	1	1	3		2	1
155	Martinez	1	1	22	2	5	1	2		6	3	3
156	Martinez	1	0	55	2	1		3		2	1	1	3	0	1	1
157	Martinez	1	0	33	2	1	1	3		6	1,3	3
158	Hill	1	1		2	2	1	2		3	6	0
159	Campbell	1	1	52	2	2	1	1		2	6	0
160	Ha	1	1	34	2	2	2	3		6	1	3
161	Ha	1	1	54	2	2	1	1		3	6	0
162	Ha	1	1	23	2	2	1	1		3	1	0
163	Ha	1	0	47	2	2	1	1		2	1	0
164	Ha	1	1	26	2	2	1	3		3		1	3	1		1
165	Ha	1	1	33	2	3	2	3		6	2	3
166	CECILIA	1	1	42	2	2	1	1		2	1	0	3	0	3	1
167	Campbell	1	1	56	2	2	1	3		6	1	0
168	Campbell	1	1	55	2	1	2	3		2	1	0
169	Campbell	1	0	27	2	1	2	3		2	1	0
170	Matthew Fries	1	0	61	2	2	1	1		6	1	3
171	Matthew Fries	1	1	20	2	6	1	2		6	1	0
172	Matthew Fries	1	0	29	0	2	1	2		2	1	0
173	Matthew Fries	1	0	45	2	1	4	4		5		1	5	0	3	5
174	Matthew Fries	1	0	45	2	1	1	1		6	1	0
175	Matthew Fries	1	1	49	2	1	1	1		6	2	3
176	Matthew Fries	1	0	57	2	1	1	2		6	1	1	3	1	1	1
177	Matthew Fries	1	1	22	1	1	1	1		6	2	3
178	Matthew Fries	1	1	57	2	2	1	1		2	1	3
179	Erika	1	0	55	2	2	3	3		1	1	0
180	Erika	1	1	52	2	2	1	2		1	6	0
181	Erika	1	1	45	2	3	1	5		2	6	1	3	0	1	4
182	Erika	1	0	58	2	2	1	2		2	1	0
183	Erika	1	0	75	2	2	2	1		4	1	0
184	Erika	1	1	32	2	1	1	1		6	1	0
185	Erika	1	1	21	2	2	1	3		3	6	0
186	Erika	1	1	53	2	1	1	2		4	3	1	3	0	1	2
187	Erika	1	1	21	2	5	1	2		6	6	3
188	Erika	1	0	54	2	1	1	2		6	3	0	0
189	Erika	1	1	34	2	2	3	3		1	1	1	5	0	1	1
190	Erika	1	0	44	2	1	5	3		5	3	3
191	Apolinario	1	1	30	2	2	1	1		3	1	0
192	Apolinario	1	1	63	2	2	3	3		1	1	0
193	Apolinario	1	1	21	2	2	1	2		6	1	3
194	Apolinario	1	1	55	2	1	2	3		2	1	0
195	Apolinario	1	1	53	2	5	1	4		2	1	3
196	Apolinario	1	1	34	2	2	1	1		2	1	3
197	Apolinario	1	1	50	2	2	1	2		2	6	1	3	0	2
198	Apolinario	1	0	48	2	5	2	1		6	1	1	3	0	1	1
199	Apolinario	1	0	42	2	2	2	2		1	1	1	1	1	3	4
200	Apolinario	1	0	60	2	1	1	2		2	3	0
201	Apolinario	1	1	56	2	2	1	2		2	1	0
202	Apolinario	1	1	2	2	2	1	2		2	1	1	5	0	1	1
203	Martinez	1	1	50	2	2	1	3		2	1	1	3	0	1	1
204	Martinez	1	1	32	2	2	2	1		6	1	3
205	Martinez	1	1	42	2	2	1	1		6	3	3
206	Martinez	1	0	39	2	2	1	1		6	2	0
207	Martinez	1	1	21	2	2	1	1		6	6	3
208	Martinez	1	1	42	2	1	2	3		2	1	0
209	Baum	1	0	58	2	1	1	3		1	6	0
210	CECILIA	1	0	41	2	2	1	1		3	6	0
211	CECILIA	1	0	48	2	2	1	3		3	2	0
212	CECILIA	1	0	30	2	2		2		6	1	3
213	CECILIA	1	1	55	2	2	3	2		1	6	1
214	CECILIA	1	1	63	2	2	1	1		3	1	1	3	0	2	5
215	CECILIA	1	0	19	2		1	6		6	0
216	CECILIA	1	1	47	2	2	1	1		1	1	0
217	CECILIA	1	0	70	2	1	3	3		4	2	1	3	0	1	1
218	CECILIA	1	1	34	2	1	1	3		6	4	0
219	CECILIA	1	1	54	2	2	2	1		3	6	0
220	CECILIA	1	1	56	2	5	1	1		6	6	3
221	CECILIA	1	0	23	2	2	3	3		6	6	3
222	CECILIA	1	1	68	2	2		1		3	1	1	5	0	1	4
223	Campbell	1	0	53	2	2	2	2		6	1	1	3	1	2	2
224	CECILIA	1	0	52	2	1	3	3		1	2	1	1	1	3	1
225	Campbell	1	1	28	2	2	1	1		6	1	3
226	Campbell	1	0	47	2	2	3	1		2	1	3
227	Campbell	1	1	37	2	1	2	2		6	1	0
228	Brandon Price	1	0	52	2	5	2	2		1	1	0
229	Matthew Fries	1	1	17	2	2	1	2		6	3	0
230	Matthew Fries	1	0	54	2	1	1	1		6	3	0
231	Matthew Fries	1	1	20	2	1	1	1		6	1	3
232	Matthew Fries	1	0	45	2	1	1	3		6	6	3
233	Matthew Fries	1	0	40	2	2	2	1		6	6	0
234	Matthew Fries	1	0	22	2	2	1	2		6	1	0
235	Matthew Fries	1	0	53	2	1	1	3		6	1	3
236	Erika D	1	1	28	2	2	1	2		3	1	1	4	0	1	4
237	Erika D	1	1	29	2	2	3	2		2	1	0
238	Erika D	1	0	37	2	5	1	3		6	6	0
239	Erika D	1	0	25	2	2	2	2		2	1	3
240	Erika D	1	1		2	2	1	2		1	1	0
241	Erika D	1	1	50	2	2	1	2		2	1	0
242	Erika D	1	0	21	2	2	4	3		6	3	3
243	Apolinario	1	0	42	2	2	1	1		2	1	0
244	Apolinario	1	1	37	2	5	1	1		2	1	3
245	Apolinario	1	1	31	2	2	2	2		6	1	3
246	Apolinario	1	0	34	2	2	1	1		6	1	3
247	Apolinario	1	1	43	2	2	1	1		2	6	3
248	Apolinario	1	1	60	2	2	2	2		6	1	1	4	0	1	1
249	Apolinario	1	0	22	2	2	1	2		3	1	0
250	Apolinario	1	1	28	2	2	2	4		6	3	3
251	Apolinario	1	1	40	2	2	3	3		1	4	0
252	Apolinario	1	1	67	2	1	1	3		1	1	0
253	Apolinario	1	1	36	2	2	1	2		1	6	3
254	Apolinario	1	1	22	2	2	1	1		3	6	0
255	Menowsky/Diedre	1	1	38	2	2	2	1		6	4	3
256	Menowsky/Diedre	1	0	38	2	2	1	2		2	1	3
257	Martinez	1	1	38	2	2	1	1		3	2	0
258	Martinez	1	1	55	2	2	1	2		2	1	0
259	Martinez	1	1	17	2	2		1		6	2	3
260	Martinez	1	1	42	2	1	1	5		2	6	0
261	Martinez	1	1	51	2	6	2	3		1	3	0
262	Martinez	1	0	45	2	5	2	1		3	1	0
263	Martinez	1	1	21	2	2	1	2		2	1	0
264	Martinez	1	1	42	2	2	1	1		6	1	0
265	Gest	1	1	38	2	2	1	1		6	2	3
266	Gest	1	1	47	2	2	1	1		2	1	1	3	0	1	1
267	Gest	1	1	46	2	2	1	2			1	1	5	0	2	5
268	Gest	1	1		2	2	1	1		3	1	1	4	1	1	4
269	Campbell	1	0	34	2	2	1	1		6	1	3
270	Close/Ha	1	1	42	2	2	1	2		2	1	0
271	Close/Ha	1	0	33	2	5	1	3		4	2	0
272	Close/Ha	1	0	26	2	1	1	2		6	1	3
273	Close/Ha	1	1	46	2	2	1	1		3	1	1	2	0	1	5
274	Close/Ha	1	0	31	2	2	3	4		1	1	0
275	Close/Ha	1	0	47	2	2	1	2		2	1	0
276	Close/Ha	1	1	50	2	1	1	5		2	1	0
277	Close/Ha	1	1	41	2	1	1	1		2	1	3
278	CECILIA	1	1	46	2	1	1	3		2	1	1	4	0	1	1
279	CECILIA	1	1	42	2	1	1	2		6	3	3
280	jessica sieling	1	0			5	1	2		4	1	3
281	pederson	1	0	57	2	1	1	3		3	5	3
282	pederson	1	1	56	2	2	1	1		3	1	1	4	1	1	1
283	hill	1	0	60	2	1		1		3		0
284	Brandon Price	1	0	78	2	2	1	1		4	3	0
285	pederson	1	1	26	2	2	2	2		6	1	3
286	hill	1	0	48	2	1	1	4		2	2	1	0
287	pederson	1	0	57	2	2	1	1		6	2	3
288	Baum	1	1	33	2	1	5	4		1	6	0
289	Brodeur, cecilia	1	0	17	2	2		2		6	6	0
290	Erika	1	0	40	2	2	1	2		6	3	3
291	Brandon Price	1	0	53	2	2		1		6	1	3
292	Campbell	1	1	51	2	1	1	2		2	6	1	1	1	1	1
293	Campbell	1	0	50	2	2	1	2		6	1	3
294	Campbell	1	1	62	2	1	1	5		2	1	1	4	1	1	1
295	Campbell	1	0	49	2	2	1	1		3	4	0
296	Campbell	1	1	41	2	2	1	1		2	4	0
297	Erika	1	1	36	2	1	1	2		2	6	3
298	Erika	1	1	26	2	1	1	2		3	1	3
299	Erika	1	0	40	2	2	1	1		2	1	3
300	Erika	1	1	48	2	1	1	3		2	6	0
301	Erika	1	0		2	2		1		2	2	0
302	Erika	1	1	26	2	2	1	2		2	1	0
303	Erika	1	0	20	2	2	1	3		6	1	0
304	Erika	1	1	41	2	2	1	1		3	1	3
305	Erika	1	0	55	2	1	1	5		4	1	1	5	0	1	1
306	Erika	1	0	42	2	6	1	2		6	1	0
307	Melissa	1	1	54	2	2	1	2		6	6	1	3	1	1	1
308	Melissa	1	1	53	2	2	1	2		3	1	0
309	Melissa	1	1	61	2	2	2	2		2	1	0
310	Melissa	1	1	21	2	2	1	1		3	1	1	1	1	1	4
311	Melissa	1	0	54	2	5	3	4		3	3	0
312	Melissa	1	1	53	2	2	2	2		6	1	0
313	Melissa	1	1	59	2	2	1	2		6	1	3
314	Melissa	1	1	64	2	2	1	1		4	1	0
315	Apolinario	1	0	58	2	2		1		6	1	1	1	1	1	2
316	Apolinario	1	0	50	2	1	1	1		6	3	0
317	Apolinario	1	1	43	2	2	5	4		6	1	0
318	Apolinario	1	1	28	2	1	1	4		2	2	1	3	0	1	2
319	Apolinario	1	1	26	2	2	1	1		3	1	0
320	Apolinario	1	1	37	2	2	2	3		6	1	3
321	Apolinario	1	1	23	2	2	1	1		6	6	3
322	Apolinario	1	0	49	2	1	1	2		3	2	3
323	Apolinario	1	0	16	2	2	4	1		6	3	0
324	Apolinario	1	1	20	2	2	1	2		6	1	0
325	Apolinario	1	1	36	2	2	1	1		2	1	3
326	Apolinario	1	0	21	2	2	1	3		3	1	0
327	Apolinario	1	0	50	2	1	1	3		2	1	0
328	Apolinario	1	1	34	2	1	1	3		6	6	3
329	Apolinario	1	1	58	2	2	1	1		1	1	0
330	Apolinario	1	0	28	2	1	1	2		6	4	3
331	Apolinario	1	0	56	2	1	1	3		6	6	3
332	Price	1	0	21	2	2	1	2		6	1	3
333	Price	1	0	47	2	2	1	4		6	1	0
334	Ha	1	0	28	2	1	2	2		6	4	3
335	Ha	1	0		2	2	1	2		2	1	1	1	0	2	4
336	Ha	1	0	60	2	5	2	2		6	1	3
337	Ha	1	1	38	2	1	1	3		2	1	1	2	0	1	1
338	Ha	1	1	24	2	5	1	1		6	1	3
339	Ha	1	1	33	2	2	1	1		3	1	0
340	CECILIA	1	1	41	2	1	1	3		1	6	1	3	0	3	4
341	CECILIA	1	1	56	2	2	1	1		2	4	0
342	CECILIA	1	1	51	2	2	1	2		6	1	1	5	0	1	2
343	CECILIA	1	1	51	2	3	1	2		2	1	1	1	1	2	4
344	CECILIA	1	0	56	2	1	3	2		2	5	0
345	Melissa	1	1	52	2	2	1	1		2	2	0
346	Melissa	1	0	48	2	1	2	3		1	3	1	3	1	1	5
347	Melissa	1	1	68	2	2	1	2		2	1	0
348	Melissa	1	1	47	2	2	2	2		2	1	3
349	Melissa	1	1	39	2	2	2	3		1	2	1	5	0	1	1
350	Melissa	1	0	62	2	2	1	1		2	1	0
351	Melissa	1	0	58	2	1	2	2		6	1	0
352	loescher	1	1	22	2	2	1	1		6	1	3
353	loescher	1	0	34	2	2	1	3		2	2	1	4	1	3	4
354	Newby	1	0	n/a	2	1	2	4		3	1	3
355	loescher	1	0	43	2	2	1	1		6	4	3
356	newby	1		47	2	2		2			1	0
357	Newby	1	0	24	2	1	3	2		2	4	3
358	Newby	1	0	52	2	1	2	3		6	1	3
359	loescher	1	0	58	2	5	2	1		2	6	0
360	Newby	1	0	40	2	1	2	2		2	5	1	3	0	3	1
361	Newby	1				2		1		6	1	1	3	0	3	1
362	Newby	1	1			2	1	2		3	6	1	3	1	1	1
363	ben leeson	1	1	40	2	2	1	2		2	1	0
364	ben leeson	1	1	34	2	2	1	1		2	4	1	4	0	1	1
365	Matthew Fries	1	0	53	2	2	1	1		2	1	0
366	Matthew Fries	1	0	54	2	1	1	3		3	1	1	4	0	3	1
367	fries	1	0	56	2	2	1	1		6	1	3
368	fries	1	1	65	2	5		2		3	3	1	4	1	1	1
369	fries	1	1	20	2	2	1	2		2	6	3
370	fries	1	1	27	2	2	1	2		6	6	0
371	fries	1	1	23	2	2	1	3		3	1	0
372	fries	1	1	42	2	1		2		2	2	1	3	0	2	4
373	fries	1	0	43	2	5	3	2		1	1	0
374	Newby & Erika	1	0	21	2	2	3	2		6	1	3
375	Erika	1	0	21	2	2	1	2		3	6	3
376	Erika	1	0	42	2	5	1	1		2	1	0
377	Erika	1	1	47	2	2		2		2	1	0
378	Erika, Newby	1	0	46	2	2	3	4		1	1	0
379	Erika, Newby	1	1	22	2	2	1	3		6	1	3
380	Erika, Newby	1	0	58	2	2	1	1		2	1	1	3	0	1	4
381	Erika	1	0	43	2	1	2	4		1	3	0
382	Erika	1	2	24	2	2	1	3		6	1	3
383	Erika	1	0	27	2	5	3	2		6	1	3
384	Newby, Erika	1	1	43	2	1	1	3		2	1	0
385	Erika	1	1	73	2	1	1	5		3	3	1	3	0	1	1
386	Erika	1	0	31	2	2	1			6	6	0
387	Martinez	1	0	23	2	2	1	1		6	1	0
388	Martinez	1	1	20	2	2	1	1		6	1	0
389	Martinez	1	0	56	2	2	1	2		2	1	3
390	Martinez	1	1	47	2	2	1	2		3	1	0
391	Martinez	1	1	56	2	2	1	2		4	6	1	3	0	1	1
392	Martinez	1	1	53	2	2	1	1		3	6	1	4	0	1	1
393	Martinez/Newby	1	1	37	2	1	3	3		5	1	0
394	Martinez/Newby	1	0	22	2	2	1	2		5	3	0
395	Martinez/Newby	1	0	49	2	2	1	1		2	1	3
396	Ben Leeson	1	1	20	2	2	1	1		2	1	0
397	Ben Leeson	1	1	32	2	2	1	2		6	1	3
398	Ha	1	0	33	2	2	5	4		1	6	0
399	Ha/Leverenz	1	0	42	2	2		2		3	3	1	1	1	1	2
400	Ha/Leverenz	1	1	65	2	2	1	1		3	1	0
401	Ha	1	1	22	2	2		2		6	1	0
402	Ha	1	1	25	2	1	2	2		2	1	0
403	Ha	1	1	28	2	2	1	1		6	6	3
404	Ha	1	0	49	2	2	5	3		1	3	0
405	Ha/Leverenz	1	0	41	2	1	1	3		6	6	3
406	CECILIA	1	0	24	2	2	3	2			1	1	5	0	2	5
407	CECILIA	1	0	53	2	2	1	1		1	3	0
408	CECILIA	1	1	33	2	2	1	4		2	4	0
409	CECILIA	1	1	38	2	2	2	3		2	6	1	3	2	1	1
410	CECILIA	1	1	40	2	2	1	3		6	3	3
411	CECILIA	1	0	23	2	2	1	2		3	2	0
412	CECILIA	1	0	51	2	3	1	2		4	1	1	3	0	3	1
413	Melissa	1	0	28	2	2	1	3		6	1	3
414	Melissa	1	0	54	2	2	1	2		4	1	0
415	Melissa	1	1	31	2	2	1	2		2	1	0
416	Melissa	1	0	68	2	2	2	2		1	1	1	3	1	1	1
417	Melissa	1	0	58	2	1	2	3		1	1	0
418	Melissa	1	1	36	2	2	2	2		6	3	0
419	Melissa	1	0	74	2	2	1	1		2	1	0
420	Emily	1	0	28	2	2	1	2		2	1	1	3	0	2	4
421	Emily	1	0	52	2	2	1	1		6	3	3
422	Emily	1	0	40	2	2	2	2		6	2	1
423	Emily	1	0	27	2	5	1	2		6	6	0
424	Emily	1	0	20	2	2	1	2		6	2	3
425	Emily	1	1	61	2	2	1	2		4	1	0
426	Emily	1	0	44	2	1		2		3	6	0
427	Emily	1	1	42	2	2	1	3		2	1	0
428	Emily	1	1	54	2	2	1	1		3	6	0
429	Emily	1	0	52	2	2	2	2		3	1	0
430	Emily	1	1	73	2	2	1	1		3	3	0
431	Emily	1	1	66	2	2		1		1	1	0
432	Emily	1	1	66	2	2	2	5		4	1	0
433	Emily	1	0	40	2	1	2	5		1	2	0
434	Emily	1	1	35	2	2	1	3		6	1	3
435	Travis	1	1	82	2	5	1	1		4	1	1
436	Travis	1	1	60	2	2	1	1		6	3	3
437	Travis	1	0	29	2	2	2	2		6	3	0
438	Travis	1	1	39	2	1	3	4		3	2	3
439	Newby	1	1	52	2	2	1	1		3	1	0
440	Baum	1	1	62	2	2	1	1		2	2	0
441	Baum	1	1			2	2	1		6	1	3
442	Ha	1	0	50	2	1	1	1		6	1	3
443	Ha	1	1	66	2	2	1	1		3	4	1	3	0	2	3
444	Ha	1	0	34	2	2	1	3		2	6	1	3	0	2	4
445	Ha	1	0	21	2	2	1	1		3	1	0
446	Ha	1	0	25	2	2	3	3		2	1	1	4	1	1	3
447	Ha	1	0	59	2	2	1	2		2	6	0
448	Ha	1	1	20	2	2	1	3		6	1	1	3	0	2	1
449	Ha	1	1	47	2	2		2		2	1	0	3	0	2	4
450	Ha	1	1	63	2	2	1	1		3	6	0
451	Ha	1	1	24	2	2	1	3		6	1	3
452	Ha	1	0	55	2	3	1	4		6	1	0	4	0	1	1
453	Ha	1	1	27	2		1	2		3	4	0
454	Ha	1	0	49	2	2	1	2		3	1	1	5	1	1	1
455	Ha	1	0	58	2	2	1	1		6	6	1	1	0	1	1
456	Ha	1	0	38	2	5	2	3		1	2	1	3	0	1	3
457	Melissa	1	0	27	2	2	1	3		6	1	0
458	Melissa	1	0	56	2	2	1	2		2	1	0
459	Melissa	1	1	47	2	2	1	1		3	6	0
460	Melissa	1	0	18	2	5	1	2		3	1	3
461	Melissa	1	0	22	2	2	3	3		6	6	0
462	Melissa	1	1	56	2	2	1	2		3	3	0
463	Melissa	1	0	40	2	2	1	1		6	1	3
464	Melissa	1	1	38	2	1	1	2		2	2	0
465	Melissa	1	0	52	2	2	1	1		2	1	0
466	Melissa	1	0	35	2	2	1	1		6	3	0
467	Melkus	1	0	24	2	2	2	5		2	1	1	5	0	2	4
468	Ha/Melkus	1	0	27	2	2	3	3		1	1	1	3	1	2	2
469	Ha	1	0	39	2	1	1	1		2	1	3
470	Ha	1	1	37	2	1	1	4		3	6	3
471	Ha	1	1	33	2	2	1	4		2	1	1	4	1	1	4
472	Ha	1	1			2		1		6	6	1	4	0	2	1
473	Ha	1	1	47	2	5	1	2		2	1	0
474	Ha	1	0	57	2	5	1	2		4	6	3
475	Ha	1	1	32	2	1	1	1		6	1	3
476	Ha	1	1	25	2	2	1	1		3	2	3
477	Ha	1	0	30	2	2	1	1		6	3	3
478	Ha	1	1	23	2	2	1	3		6	6	0
479	Ha	1	1	32	2	1	1	3		6	1	0
480	Ha	1	1	50	2	2	1	2		6	2	0
481	Ha	1	0	36	2	2	1	1		2	1	0
482	Ha	1	1	68	2	2	1	2		3	1	0
483	Ha	1	0	56	2	2		1		2		0
484	Ha	1	1	28	2	1	1	4		3	1	0
485	Ha	1	0	38	2	1	2	3		1	1	0
486	CECILIA	1	1	29	2	2	1	1		6	1	3
487	CECILIA	1	0	35	2	2	1	2		2	1	0
488	CECILIA	1	0	60	2	1	2	1		3	1	1	2	0	1	0
489	CECILIA	1	0	51	2	2	3	2			6	0
490	CECILIA	1	0	68	2	2	1	2		4	1	1	3	0	2	4
491	CECILIA	1	1	86	2	2	1	1		3	6	0
492	CECILIA	1	0	36	2	2	3	2		1	6	0
493	CECILIA	1	0	43	2	2	1	2		2	1	1	3	0	1	5
494	CECILIA	1	0	68	2	2	1	2		4	5	0
495	CECILIA	1	1	42	2	2	1	3		6	2	3
496	CECILIA	1	0	39	2	2	1	2		6	1	0
497	CECILIA	1	1	53	2	1	1	1		2	1	3
498	CECILIA	1	1	47	2	1	1	2		3	3	1	3	0	1	1
499	CECILIA	1	1	50	2	1	1	1		2	1	0	4	0	2	4
500	CECILIA	1	0	33	2	2	1	2		3	1	0
501	CECILIA	1	1	54	2	1	1	1		3	1	0
502	CECILIA	1	0	30	2	5	1	2		6	1	0
503	CECILIA	1	1	45	2	2	1	2		6	1	3
504	Ha	1	1	59	2	1	1	3		2	6	0
505	Ha	1	0	32	2	2	3	2		1	1	3
506	Ha	1	0	46	2	1	1	2		2	6	3
507	Ha	1	0	49	2	2	2	4		2	6	3
508	Ha	1	1	62	2	5	1	1		2	6	0
509	Ha	1	1	23	2	2	1	2		6	1	0
510	Ha	1	1	38	2	1	2	2		6	1	0
511	Ha	1	1	54	2	2	1	2		2	3	0
512	Ha	1	0	37	2	1	1	1		3	3	0
513	Ha/Newby	1	0	36	2	2	2	1		6	1	3
514	Ha/Newby	1	1	55	2	2	1	1		3	1	0
515	Ha/Nguyen	1	0	56	2	1	1	1		1	2	0
516	Melissa	1	0	49	2	2	1	1		6	1	3
517	Melissa	1	0	56	2	1	1	1		1	2	0
518	Melissa	1	1	50	2	2	2	1		2	2	0
519	Melissa	1	1	26	2	2	1	1		6	1	0
520	Melissa	1	0	62	2	2	1	2		2	1	1	3	1	1	4
521	Melissa	1	0	68	2	2	2	2		1	2	1	5	0	1	1
522	Melissa	1	1	58	2	1	1	1		2	1	0
523	Melissa	1	0	69	2	2	2	2		4	2	0
524	Melissa	1	0	74	2	2	2	3		1	1	0
525	Melissa	1	1	45	2	2	1	1		2	2	0
526	Melissa	1	1	24	2	1	1	3		6	1	0
527	Melissa	1	0	23	2	2	1	3		2	1	0
528	Ha	1	1	38	2	2	1	4		3	6	1	2	0	2	3
529	Ha	1	1	19	2	2		2		6	6	3
530	Ha	1	0	34	2	1	1	3		2	3	3
531	Ha	1	1	43	2	2	2	3			1	0
532	Ha/Nguyen	1	1	25	2	2	1	5		1	3	3
533	Ha/Nguyen	1	1	25	2	1	1	3		6	2	3
534	Ha/Nguyen	1	0	55	2	2	1	1		2	6	0
535	Ha/Nguyen	1	1	42	2	1	1	3		6	1	0
536	Ha/Nguyen	1	0	44	2	2	4	3		1	6	3
537	Ha/Loescher	1	0	39	2	2	3	1		1	6	0
538	Ha/Loescher	1	0	18	2	1		3		1	3	1	3	0	1	1
539	Ha/Newby	1	1	81	2	1		3		1	3	1	5	2		1
540	Apolinario	1	0	44	2	2	4	3		1	5	0
541	Apolinario	1	0	22	2	2	1	2		6	1	1	5	0	1	1
542	Apolinario	1	0	52	2	5	1	2		1	1	0
543	Apolinario	1	1	43	2	1	1	1		2	1	0
544	Apolinario	1	1	29	2	2	2	3		3	6	0
545	Apolinario	1	1	40	2	6	1	2		6	1	3
546	Apolinario	1	1	21	2	2	1	2		6	3	3
547	Apolinario	1	1	19	2	2	1	3		6	6	3
548	Apolinario	1	0	50	2	2	3	2		6	2	0
549	Apolinario	1	1	47	2	2	2	2		2	6	0
550	Apolinario	1	1	50	2	6	1	4		3	1	0
551	Apolinario	1	0	24	2	2	1	4		6	2	3
552	Apolinario	1	0	19	2	4	1	2		2	6	3
553	Apolinario	1	1	26	2	2	1	2		3	1	1	3	2	1	1
554	Apolinario	1	0	21	2	2		2		6	6	0
555	Apolinario	1	0	18	2	2		2		6	3	3
556	Apolinario	1	1	57	2	1	1	3		6	6	3
557	Apolinario	1	0	21	2	2	2	2		6	1	1	4	0	1	3
558	Apolinario	1	1	47	2	5	1	2		2	1	0
559	Apolinario	1	1	30	2	2	1	2		3	2	0
560	Apolinario	1	1	42	2	2	1	1		3	1	0
561	Apolinario	1	1	21	2	2	2	1		6	1	3
562	Apolinario	1	0	25	2	2	1	2		6	4	0
563	Apolinario	1	1	39	2	2	2	2		6	1	3
564	Apolinario	1	0	50	2	2		2		3	1	0
565	Apolinario	1	0	47	2	2	2	1		3	1	1	1	0	1	5
566	Apolinario	1	1	44	2	2	1	1		3	6	0
567	Apolinario	1	1	47	2	2		2		1	1	0
568	Apolinario	1	0	37	2	2	1	1		4	1	1	3	0	1	1
569	Apolinario	1	1	19	2	1	1	2		6	1	0
570	Melissa	1	0	34	2	2	1	4		2	1	0
571	Melissa	1	1	38	2	1	1	1		2	1	9
572	Melissa	1	1	62	2	2	1	2		2	2	0
573	Melissa	1	0	52	2	2	1	3		4	3	0
574	Melissa	1	0	56	2	2	1	1		2	1	1	5	0	1	1
575	Melissa	1	1	45	2	2	1	2		2	2	0
576	Apolinario	1	0	53	2	1	3	3		5	1	0
577	Apolinario	1	1	26	2	2	1	3		1	1	3
578	Apolinario	1	1	48	2	1	1	3		6	6	3
579	Apolinario	1	0	19	2	6	2	2		6	1	3
580	Apolinario	1	1	54	2	2	1	1		3	1	1	5	0	1	1
581	Apolinario	1	1	65	2	2	1	1		3	1	0
582	Apolinario	1	0	51	2	1	1	2		2	1	0
583	Apolinario	1	1	44	2	2	1	2		2	1	0
584	Apolinario	1	1	42	2	2		1		2	6	0
585	Apolinario	1	1	43	2	1	1	3		2	1	0
586	Apolinario	1	1	43	2	2	1	2		6	1	3
587	Apolinario	1	1	29	2	2	1	4		3	1	3
588	Apolinario	1	0	56	2	2	1	4		3	1	0
589	Apolinario	1	0	54	2	2	1	4		2	1	0
590	Apolinario	1	1	47	2	2	2	3		5	6	0
591	Emily	1	0	64	2	2	2	1		4	6	0
592	Emily	1	1	21	2	5	1	5		4	2	0
593	Emily	1	0	35	2	1	2	2		6	6	0
594	Emily	1	1	22	2	2	1	2		3	1	3
595	Emily	1	1	46	2	2	1	1		6	1	1	3	1	1	5
596	Emily	1	0	50	2	1	1	2		3	1	0
597	Emily	1	0	45	2	1	1	1		2	3	1	4	1	1	4
598	Emily	1	1	35	2	2	2	2		6	1	0
599	Emily	1	1	22	2	1	2	3		6	3	0
600	Emily	1	1	54	2	5	1	3		3	1	0
601	Emily	1	0	49	2	2	2	3		2	6	1	1	1	1	4
602	Emily	1	0	50	2	1	5	4		1	3	0
603	Emily	1	1	40	2	2	1	2		6	1	3
604	Emily	1	0	26	2	2	3	3		6	1	3
605	Emily	1	0	37	2	2	3	2		1	1	0
606	Emily	1	1	40	2	2	1	2		6	4	3
607	Fries/Baum	1	0	20	2	2	1	2		6	2	3
608	Fries/Baum	1	0	50	2	5		2		4	1	1	3	0	1	1
609	Fries/Baum	1	1	34	2	2	3	4		1	1	1	3	0	1	1
610	Fries/Baum	1	0	58	2	2		1		3	1	0
611	Fries/Baum	1	1	37	2	2	1	1		2	2	0
612	Fries/Baum	1	1	42	2	1	1	2		3	1	1	3	0	1	5
613	Fries/Baum	1	0	44	2	5	2	3		1	3	0
614	Fries/Baum	1	1	70	2	2	1	2		4	1	0
615	Fries/Baum	1	0		2	2		2		6	1	1	3	0	1	1
616	Fries/Baum	1	0	40	2	6	1	3		6	1	0
617	Fries/Baum	1	1	32	2	1	1	3		2	1	1	3	0	2	4
618	Fries/Baum	1	0	36	2	1	1	1		6	2	0
619	Melissa	1	1	54	2	2	1	3		1	6	0
620	Melissa	1	0	31	2	1	1	1		2	2	0
621	Melissa	1	1	34	2	1	1	1		6	1	3
622	Melissa	1	1	16	2	2	1	1		3	3	3
623	Melissa	1	0	30	2	2	4	3		1	1	3
624	Melissa	1	0	28	2	2	1	2		2	1	0
625	Erika D	1	0	18	2	5	1	1		6	3	3
626	Erika D	1	1	47	2	2	2	3		1	1	0
627	Erika D	1	1	33	2	2	1	2		3	1	3
628	Erika D	1	1	43	2	2	1	2		2	1	0
629	Erika D	1	1	42	2	5	3	4		6	1	0
630	Melissa	1	1	32	2	1	2	3		1	1	0
631	Melissa	1	0	48	2	2	1	1		2	3	0
632	Melissa	1	0	68	2	2	1	2		2	2	0
633	Melissa	1	0	52	2	1	1	2		2	1	3
634	Apolinario	1	1	39	2	1	1	2		2	1	0
635	Apolinario	1	1	82	2	2	1	1		1	6	1	4	0	1	1
636	Apolinario	1	1	45	2	1	1	2		2	6	0
637	Apolinario	1	1	48	2	2	1	1		6	1	0
638	Apolinario	1	0	23	2	2	3	3		6	3	3
639	Apolinario	1	0	60	2	1	1	2		2	1	1	4	0	1	3
640	Apolinario	1	1	59	2	2	1	1		2	1	0
641	Apolinario	1	0	27	2	2	2	1		6	1	3
642	Apolinario	1	1	58	2	1	1	3		3	2	0
643	Apolinario	1	0	55	2	2		1		2	6	1	3	1	1	4
644	Apolinario	1	1	18	2	2	1	3		1	2	3
645	Apolinario	1	1	48	2	2	1	3		2	1	1	3	0	1	4
646	Apolinario	1	0	33	2	2	2	3		6	1	3
647	Melkus		1	20	2	2	1	2		2	6	0
648	Ha/Russell	1	1	21	2	1	1	2			6	3
649	Ha/Russell	1	1	24	2	2	1	2		6	6	3
650	Ha/Russell	1	1	81	2	2		1		3	6	1	4	0	1	1
651	Ha/Shriver	1	1	24	2	2	1	2		3	2	3
652	Ha/Shriver	1	0	42	2	1	1	1		2	2	0
653	Ha/Shriver	1	0	38	2	2	3	3		1	1	0
654	Ha	1	1	58	2	2	1	1		1	1	0
655	Ha	1	1	37	2	1	1	2		6	1	3
656	Ha	1	0	26	2	2	1	3		6	3	3
657	Ha	1	1	23	2	2	1	4		2	1	0
658	Ha	1	0	26	2	2	1	2		2	5	0
659	Ha	1	1	56	2	1	1	1		1	1	1	3	0	1	1
660	Ha	1	1	56	2	1	1	4		1	6	1	3	0	1	1
661	Ha	1	1	63	2	1	1	1		3	6	0
662	Ha	1	1	32	2	2	1	1		3	1	3
663	Ha	1	1	19	2	5	1	2		2	6	0
664	Ha	1	0	62	2	2		1		6	6	3
665

## Sheet: LEGEND
Subject Number	Survey Collector Name	Participation Status	Question 1 Gender	Question 2 Age (< 90 years)	Question 2 Age (> 90 years)	Question 3 Race	Question 4 Yearly Income	Question 5 Highest Level of Education	Question 6 Highest Level of Education	Question 7 Insurance	Question 8	Question 9	Question 10	Question 11	Question 12
		1=Participated	0=Male	Age if < 89	Age > 89	1=Caucasian/White	1=$0-20,000	1=Less than High School	1=Private Insurance	1=Pain	1=Yes	1=Doctor	1=Yes	1=Go to the ER	1=No appointment was scheduled
		2=Patient Refused	1=Female			2=Hispanic	2=$20,000-$40,000	2=High School Graduate	2=Nueces Aid ("Clinic Card")	2=Infection	0=No	2=PA/NP	0=No	2=Schedule an appointment	2=1-2 days
		3=Medically Unstable				3=Native American	3=$40,000-$$60,000	3=Some College	3=Medicaid	3=Injury	3=I do not have a doctor	3=Receptionist		3=Come in today	3=2-4 days
		4=Cognitively Impaired				4=Asian	4=$60,000-$80,000	4=College Graduate	4=Medicare	4=Vomiting/Diarrhea		4=Nurse			4=more than 1 week
						5=Non-Hispanic/Black	5=$80,000 or more	5=Any Post Graduate Work	5=Self-Insured	5=Out of Medications		5=Recorded Message			5=more than 1 month
						6=Other			6=None	6=Other
